# Supplementary material
Source: MDPI journal article supplement (https://www.mdpi.com/2073-4441/15/1/157)
Supplement: s1 [file s1]

**Table S1.** Location of springs and physical parameters of their waters

| Outflow number | Coordinates     |                  | Morphological location | Environment | Temp. [°C] | EC [μS/cm] | pH [-] |
|----------------|-----------------|------------------|------------------------|-------------|------------|------------|--------|
| 1              | N 52° 24' 22.5" | E 015° 13' 11.9" | Valley                 | Agriculture | 9.9        | 481        | 6.42   |
| 2              | N 52° 25' 04.7" | E 015° 13' 49.7" |                        |             | 10.0       | 602        | 7.21   |
| 3              | N 52° 24' 04.0" | E 015° 09' 18.3" |                        | Forest      | 9.8        | 307        | 7.34   |
| 4              | N 52° 24' 11.8" | E 015° 09' 18.3" |                        | Agriculture | 9.8        | 425        | 7.38   |
| 5              | N 52° 25' 59.1" | E 015° 06' 42.9" |                        | Urban       | 9.8        | 588        | 9.30   |
| 6              | N 52°28' 18.5"  | E 015° 08' 23.6" |                        | Agriculture | 9.5        | 592        | 7.50   |
| 7              | N 52° 26' 30.5" | E 015° 11' 54.0" | Ryriverbed             | Forest      | 9.3        | 578        | 7.60   |
| 8              | N 52° 26' 13.6" | E 015° 11' 44.1" | Valley                 |             | 9.8        | 342        | 7.60   |
| 9              | N 52° 26' 13.7" | E 015° 11' 43.0" | Ryriverbed             |             | 9.8        | 428        | 7.67   |
| 10             | N 52° 24' 03.7" | E 015° 09' 31.4" | Valley                 |             | 8.8        | 301        | 7.74   |
| 11             | N 52° 24' 06.2" | E 015° 09' 31.1" |                        |             | 9.0        | 338        | 7.76   |
| 12             | N 52° 24' 06.3" | E 015° 09' 30.3" |                        |             | 9.2        | 284        | 7.77   |
| 13             | N 52° 24' 07.7" | E 015° 09' 29.3" |                        |             | 9.1        | 317        | 8.16   |
| 14             | N 52° 24' 11.5" | E 015° 09' 22.0" |                        |             | 8.8        | 301        | 7.80   |
| 15             | N 52° 24' 68.3" | E 015° 08' 80.9" |                        |             | 9.1        | 298        | 7.84   |
| 16             | N 52° 24' 31.9" | E 015° 07' 43.9" |                        |             | 9.6        | 434        | 7.76   |
| 17             | N 52° 24' 36.7" | E 015° 07' 36.0" |                        |             | 9.2        | 392        | 7.86   |
| 18             | N 52° 24' 41.0" | E 015° 07' 26.6" | 8.7                    |             | 397        | 7.79       |        |
| 19             | N 52° 28' 36.3" | E 015° 06' 70.0" | Hillside               | Urban       | 8.3        | 382        | 7.84   |
| 20             | N 52° 28' 57.6" | E 015° 05' 13.5" | Scarp-foot             | Forest      | 7.5        | 376        | 7.77   |
| 21             | N 52° 29' 20.1" | E 015° 05' 63.4" |                        |             | 8.7        | 526        | 7.60   |
| 22             | N 52° 29' 20.1" | E 015° 05' 61.1" |                        |             | 9.4        | 559        | 8.90   |
| 23             | N 52° 29' 19.7" | E 015° 04' 60.2" |                        |             | 9.1        | 546        | 7.60   |
| 24             | N 52° 29' 19.6" | E 015° 04' 57.6" |                        |             | 9.4        | 549        | 7.70   |
| 25             | N 52° 29' 23.4" | E 015° 04' 35.1" |                        |             | 9.1        | 508        | 7.62   |
| 26             | N 52° 29' 23.7" | E 015° 04' 33.2" |                        |             | 9.2        | 549        | 7.68   |
| 27             | N 52° 26' 81.3" | E 015° 06' 34.5" |                        |             | Valley     | Urban      | 9.8    |
| 28             | N 52° 26' 64.5" | E 015° 11' 69.3" | 9.7                    | 413         |            |            | 7.66   |

**Table S2.** Statistical comparison of physico-chemical parameters determination results for spring water samples

*A. Agricultural area (n=4)*

| Parameters                    | Units    | Minimum | Lower quartile | Average | Mean   | Upper quartile | Maximum |
|-------------------------------|----------|---------|----------------|---------|--------|----------------|---------|
| T                             | [°C]     | 9.50    | 9.65           | 9.80    | 9.85   | 9.95           | 10.0    |
| EC                            | [μS/cm]  | 425     | 453            | 525     | 536.5  | 597            | 602     |
| pH                            | [-]      | 6.42    | 6.82           | 7.13    | 7.30   | 7.44           | 7.50    |
| Alkalinity                    | [mval/l] | 2.5     | 2.7            | 2.9     | 2.9    | 3.1            | 3.2     |
| NH <sub>4</sub> <sup>+</sup>  | [mg/l]   | 0.192   | 0.402          | 0.544   | 0.611  | 0.686          | 0.761   |
| NO <sub>2</sub> <sup>-</sup>  |          | 0.011   | 0.013          | 0.114   | 0.018  | 0.215          | 0.408   |
| NO <sub>3</sub> <sup>-</sup>  |          | 6.14    | 14.3           | 30.8    | 30.7   | 47.2           | 55.6    |
| Fe                            |          | 0.05    | 0.06           | 0.28    | 0.08   | 0.49           | 0.89    |
| Mn                            |          | 0.02    | 0.02           | 0.04    | 0.03   | 0.06           | 0.09    |
| Cl <sup>-</sup>               |          | 9.06    | 9.73           | 13.7    | 11.4   | 17.6           | 22.9    |
| PO <sub>4</sub> <sup>3-</sup> |          | 0.08    | 0.09           | 0.11    | 0.10   | 0.13           | 0.15    |
| SO <sub>4</sub> <sup>2-</sup> |          | 30.4    | 31.8           | 39.0    | 33.8   | 46.3           | 58.1    |
| Ca <sup>2+</sup>              |          | 64.5    | 67.5           | 72.7    | 70.7   | 77.9           | 84.9    |
| Mg <sup>2+</sup>              |          | 5.55    | 5.83           | 7.90    | 7.37   | 9.97           | 11.3    |
| Na <sup>+</sup>               |          | 4.03    | 4.54           | 5.22    | 5.18   | 5.91           | 6.50    |
| K <sup>+</sup>                |          | 1.19    | 1.66           | 2.17    | 2.37   | 2.68           | 2.73    |
| Be                            | [μg/l]   | 0.007   | 0.008          | 0.010   | 0.009  | 0.012          | 0.015   |
| As                            |          | 0.82    | 0.85           | 1.23    | 1.24   | 1.62           | 1.63    |
| Sr                            |          | 79.7    | 84.2           | 95.1    | 91.7   | 105.9          | 117.2   |
| Zn                            |          | 12.2    | 12.9           | 57.6    | 27.3   | 102.2          | 163.4   |
| Pb                            |          | 0.77    | 1.03           | 1.35    | 1.31   | 1.68           | 2.03    |
| Cr                            |          | 0.11    | 0.11           | 0.13    | 0.12   | 0.15           | 0.17    |
| Ni                            |          | 1.49    | 1.52           | 1.65    | 1.60   | 1.78           | 1.89    |
| Cu                            |          | 2.47    | 3.27           | 4.58    | 4.38   | 5.88           | 7.06    |
| Ba                            |          | 13.9    | 17.5           | 22.2    | 23.3   | 26.8           | 28.1    |
| Li                            |          | 1.05    | 1.17           | 1.99    | 1.81   | 2.82           | 3.30    |
| Tm                            |          | 0.0005  | 0.0005         | 0.0016  | 0.0016 | 0.0027         | 0.0028  |
| Th                            |          | 0.0019  | 0.0027         | 0.0041  | 0.0037 | 0.0055         | 0.0071  |
| Pr                            |          | 0.0042  | 0.0098         | 0.0310  | 0.0287 | 0.0522         | 0.0623  |
| Eu                            |          | 0.0071  | 0.0079         | 0.0131  | 0.0130 | 0.0182         | 0.0191  |
| Er                            |          | 0.0047  | 0.0055         | 0.0113  | 0.0106 | 0.0172         | 0.0195  |
| Dy                            |          | 0.0045  | 0.0073         | 0.0188  | 0.0180 | 0.0303         | 0.0347  |
| Lu                            |          | 0.0007  | 0.0008         | 0.0018  | 0.0019 | 0.0028         | 0.0028  |
| Ho                            |          | 0.0010  | 0.0014         | 0.0039  | 0.0037 | 0.0064         | 0.0072  |
| Tb                            |          | 0.0003  | 0.0009         | 0.0033  | 0.0032 | 0.0058         | 0.0066  |
| Gd                            |          | 0.0055  | 0.0096         | 0.0261  | 0.0245 | 0.0427         | 0.0500  |
| Sm                            |          | 0.0042  | 0.0085         | 0.0244  | 0.0228 | 0.0403         | 0.0478  |
| Sc                            |          | 0.445   | 0.457          | 0.546   | 0.527  | 0.635          | 0.685   |
| Nd                            |          | 0.020   | 0.039          | 0.122   | 0.110  | 0.205          | 0.248   |
| Ce                            |          | 0.036   | 0.087          | 0.196   | 0.208  | 0.304          | 0.331   |
| La                            |          | 0.022   | 0.044          | 0.131   | 0.120  | 0.218          | 0.262   |
| Al                            |          | 16.3    | 17.2           | 19.5    | 18.5   | 21.8           | 24.8    |
| V                             |          | 0.32    | 0.39           | 0.48    | 0.50   | 0.57           | 0.59    |
| Co                            |          | 0.18    | 0.18           | 0.21    | 0.21   | 0.25           | 0.25    |
| Se                            |          | 0.18    | 0.21           | 0.30    | 0.25   | 0.40           | 0.53    |
| Sb                            |          | 0.08    | 0.09           | 0.11    | 0.10   | 0.12           | 0.14    |
| Rb                            |          | 0.58    | 0.66           | 0.72    | 0.74   | 0.79           | 0.83    |

|    |       |       |       |       |       |       |
|----|-------|-------|-------|-------|-------|-------|
| Mo | 0.15  | 0.17  | 0.25  | 0.20  | 0.32  | 0.43  |
| U  | 0.173 | 0.249 | 0.426 | 0.433 | 0.603 | 0.667 |
| Cd | 0.007 | 0.014 | 0.024 | 0.026 | 0.034 | 0.037 |

*B. Forest area (n=17)*

| Parameters                    | Units    | Minimum | Lower quartile | Average | Mean   | Upper quartile | Maximum |
|-------------------------------|----------|---------|----------------|---------|--------|----------------|---------|
| T                             | [°C]     | 7.50    | 9.00           | 9.12    | 9.10   | 9.40           | 9.80    |
| EC                            | [µS/cm]  | 284     | 307            | 418     | 376    | 546            | 578     |
| pH                            | [-]      | 7.34    | 7.60           | 7.77    | 7.70   | 7.77           | 8.90    |
| Alkalinity                    | [mval/l] | 1.8     | 2.6            | 3.0     | 2.9    | 3.5            | 4.6     |
| NH <sub>4</sub> <sup>+</sup>  | [mg/l]   | 0.132   | 0.440          | 0.546   | 0.520  | 0.637          | 0.977   |
| NO <sub>2</sub> <sup>-</sup>  |          | 0.003   | 0.008          | 0.044   | 0.009  | 0.013          | 0.441   |
| NO <sub>3</sub> <sup>-</sup>  |          | 0.124   | 0.744          | 2.32    | 0.898  | 1.95           | 13.2    |
| Fe                            |          | 0.05    | 0.87           | 5.52    | 1.86   | 6.72           | 25.3    |
| Mn                            |          | 0.01    | 0.05           | 0.39    | 0.08   | 0.24           | 2.96    |
| Cl <sup>-</sup>               |          | 4.72    | 9.47           | 11.4    | 10.5   | 11.8           | 30.7    |
| PO <sub>4</sub> <sup>3-</sup> |          | 0.07    | 0.08           | 0.11    | 0.09   | 0.11           | 0.21    |
| SO <sub>4</sub> <sup>2-</sup> |          | 8.47    | 24.8           | 59.8    | 73.7   | 89.2           | 119.0   |
| Ca <sup>2+</sup>              |          | 60.7    | 66.4           | 76.3    | 78.5   | 81.0           | 95.9    |
| Mg <sup>2+</sup>              |          | 1.91    | 3.89           | 5.72    | 6.34   | 7.44           | 9.12    |
| Na <sup>+</sup>               |          | 2.55    | 4.53           | 5.62    | 5.32   | 6.12           | 12.2    |
| K <sup>+</sup>                |          | 0.30    | 0.81           | 1.50    | 1.14   | 1.88           | 5.84    |
| Be                            |          | 0.005   | 0.008          | 0.037   | 0.015  | 0.028          | 0.301   |
| As                            |          | 0.68    | 1.09           | 3.19    | 2.09   | 3.96           | 12.6    |
| Sr                            |          | 49.5    | 58.0           | 84.2    | 70.4   | 94.9           | 200.4   |
| Zn                            | [µg/l]   | 1.85    | 4.17           | 20.1    | 5.87   | 24.2           | 106.4   |
| Pb                            |          | 0.22    | 0.50           | 1.44    | 1.10   | 2.02           | 4.08    |
| Cr                            |          | 0.02    | 0.10           | 0.21    | 0.17   | 0.23           | 0.74    |
| Ni                            |          | 0.65    | 0.84           | 1.20    | 1.06   | 1.29           | 2.54    |
| Cu                            |          | 0.57    | 0.71           | 2.46    | 1.74   | 2.73           | 9.77    |
| Ba                            |          | 5.60    | 8.92           | 26.2    | 13.5   | 17.0           | 151.8   |
| Li                            |          | 0.48    | 1.16           | 2.81    | 2.35   | 2.68           | 12.1    |
| Tm                            |          | 0.0002  | 0.0004         | 0.0035  | 0.0007 | 0.0023         | 0.0359  |
| Th                            |          | 0.0003  | 0.0021         | 0.0250  | 0.0152 | 0.0288         | 0.1189  |
| Pr                            |          | 0.0006  | 0.0098         | 0.0853  | 0.0258 | 0.0801         | 0.7201  |
| Eu                            |          | 0.0007  | 0.0044         | 0.0236  | 0.0104 | 0.0194         | 0.1777  |
| Er                            |          | 0.0010  | 0.0037         | 0.0312  | 0.0118 | 0.0238         | 0.2822  |
| Dy                            |          | 0.0002  | 0.0067         | 0.0555  | 0.0210 | 0.0513         | 0.4865  |
| Lu                            |          | 0.0001  | 0.0003         | 0.0033  | 0.0006 | 0.0019         | 0.0330  |
| Ho                            |          | 0.0002  | 0.0008         | 0.0106  | 0.0039 | 0.0090         | 0.0996  |
| Tb                            |          | 0.0002  | 0.0008         | 0.0097  | 0.0038 | 0.0078         | 0.0881  |
| Gd                            |          | 0.0016  | 0.0094         | 0.0743  | 0.0260 | 0.0613         | 0.6622  |
| Sm                            |          | 0.0003  | 0.0073         | 0.0654  | 0.0214 | 0.0502         | 0.5524  |
| Sc                            |          | 0.412   | 0.658          | 1.06    | 1.06   | 1.18           | 2.03    |
| Nd                            |          | 0.008   | 0.043          | 0.337   | 0.104  | 0.285          | 2.86    |
| Ce                            |          | 0.020   | 0.102          | 0.794   | 0.257  | 0.893          | 6.10    |
| La                            |          | 0.005   | 0.043          | 0.379   | 0.120  | 0.338          | 3.25    |
| Al                            |          | 4.67    | 15.4           | 64.7    | 29.8   | 66.6           | 351.5   |
| V                             |          | 0.11    | 0.27           | 0.79    | 0.63   | 0.94           | 3.64    |
| Co                            |          | 0.07    | 0.15           | 0.31    | 0.19   | 0.36           | 1.35    |
| Se                            |          | 0.08    | 0.11           | 0.19    | 0.15   | 0.22           | 0.46    |

|    |       |       |       |       |       |       |
|----|-------|-------|-------|-------|-------|-------|
| Sb | 0.01  | 0.05  | 0.08  | 0.06  | 0.08  | 0.36  |
| Rb | 0.37  | 0.61  | 1.69  | 0.81  | 1.17  | 13.8  |
| Mo | 0.01  | 0.15  | 0.35  | 0.27  | 0.39  | 1.86  |
| U  | 0.009 | 0.090 | 0.341 | 0.228 | 0.438 | 1.29  |
| Cd | 0.001 | 0.004 | 0.019 | 0.008 | 0.025 | 0.066 |

*C. Urban area (n=7)*

| Parameters                    | Units    | Minimum | Lower quartile | Average | Mean   | Upper quartile | Maximum |
|-------------------------------|----------|---------|----------------|---------|--------|----------------|---------|
| T                             | [°C]     | 8.30    | 8.70           | 9.30    | 9.60   | 9.80           | 9.80    |
| EC                            | [μS/cm]  | 303     | 382            | 415.6   | 397    | 434            | 588     |
| pH                            | [-]      | 7.48    | 7.66           | 7.74    | 7.79   | 7.84           | 7.86    |
| Alkalinity                    | [mval/l] | 3.0     | 3.1            | 3.4     | 3.6    | 3.7            | 4.0     |
| NH <sub>4</sub> <sup>+</sup>  | [mg/l]   | 0.188   | 0.467          | 0.906   | 0.750  | 1.24           | 1.84    |
| NO <sub>2</sub> <sup>-</sup>  |          | 0.007   | 0.008          | 0.024   | 0.011  | 0.024          | 0.090   |
| NO <sub>3</sub> <sup>-</sup>  |          | 0.095   | 0.125          | 5.93    | 2.13   | 13.4           | 18.3    |
| Fe                            |          | 0.29    | 0.93           | 2.34    | 1.20   | 2.38           | 8.99    |
| Mn                            |          | 0.01    | 0.03           | 0.08    | 0.05   | 0.14           | 0.26    |
| Cl <sup>-</sup>               |          | 5.27    | 10.7           | 19.7    | 18.1   | 31.3           | 32.3    |
| PO <sub>4</sub> <sup>3-</sup> |          | 0.08    | 0.09           | 0.12    | 0.11   | 0.12           | 0.21    |
| SO <sub>4</sub> <sup>2-</sup> |          | 25.8    | 40.2           | 55.9    | 58.1   | 71.6           | 85.0    |
| Ca <sup>2+</sup>              |          | 73.7    | 74.4           | 83.3    | 80.9   | 94.3           | 98.6    |
| Mg <sup>2+</sup>              |          | 5.48    | 5.96           | 6.76    | 6.84   | 7.50           | 7.95    |
| Na <sup>+</sup>               |          | 4.89    | 5.29           | 9.07    | 7.61   | 12.6           | 15.1    |
| K <sup>+</sup>                |          | 0.92    | 1.41           | 3.21    | 2.39   | 5.49           | 6.60    |
| Be                            |          | 0.009   | 0.011          | 0.019   | 0.019  | 0.026          | 0.037   |
| As                            |          | 1.09    | 1.25           | 1.66    | 1.57   | 1.89           | 3.00    |
| Sr                            |          | 81.3    | 84.4           | 123.2   | 116.3  | 161.3          | 165.5   |
| Zn                            | [μg/l]   | 2.19    | 3.54           | 29.3    | 9.85   | 72.4           | 100.5   |
| Pb                            |          | 0.45    | 0.48           | 1.27    | 0.68   | 1.23           | 4.62    |
| Cr                            |          | 0.08    | 0.09           | 0.26    | 0.24   | 0.43           | 0.49    |
| Ni                            |          | 0.76    | 0.82           | 1.49    | 1.35   | 2.52           | 2.64    |
| Cu                            |          | 0.75    | 1.07           | 3.02    | 2.35   | 5.84           | 7.22    |
| Ba                            |          | 14.1    | 17.9           | 23.8    | 20.3   | 24.6           | 49.6    |
| Li                            |          | 1.09    | 1.09           | 3.59    | 2.94   | 5.90           | 7.61    |
| Tm                            |          | 0.0001  | 0.0001         | 0.0009  | 0.0003 | 0.0008         | 0.0043  |
| Th                            |          | 0.0048  | 0.0100         | 0.0280  | 0.0263 | 0.0475         | 0.0537  |
| Pr                            |          | 0.0084  | 0.0099         | 0.0305  | 0.0124 | 0.0199         | 0.1336  |
| Eu                            |          | 0.0089  | 0.0089         | 0.0148  | 0.0101 | 0.0138         | 0.0424  |
| Er                            |          | 0.0018  | 0.0050         | 0.0110  | 0.0059 | 0.0070         | 0.0455  |
| Dy                            |          | 0.0053  | 0.0074         | 0.0204  | 0.0099 | 0.0136         | 0.0857  |
| Lu                            |          | 0.0002  | 0.0002         | 0.0012  | 0.0005 | 0.0010         | 0.0055  |
| Ho                            |          | 0.0002  | 0.0010         | 0.0033  | 0.0015 | 0.0019         | 0.0157  |
| Tb                            |          | 0.0000  | 0.0004         | 0.0029  | 0.0008 | 0.0020         | 0.0148  |
| Gd                            |          | 0.0047  | 0.0063         | 0.0248  | 0.0114 | 0.0143         | 0.1137  |
| Sm                            |          | 0.0067  | 0.0086         | 0.0252  | 0.0108 | 0.0176         | 0.1077  |
| Sc                            |          | 0.732   | 1.07           | 1.23    | 1.25   | 1.45           | 1.59    |
| Nd                            |          | 0.037   | 0.047          | 0.125   | 0.054  | 0.083          | 0.534   |
| Ce                            |          | 0.079   | 0.083          | 0.277   | 0.126  | 0.188          | 1.18    |
| La                            |          | 0.034   | 0.043          | 0.125   | 0.065  | 0.083          | 0.529   |
| Al                            |          | 10.9    | 15.4           | 37.9    | 16.0   | 34.9           | 147.5   |
| V                             |          | 0.22    | 0.27           | 0.65    | 0.55   | 0.95           | 1.39    |

|    |       |       |       |       |       |       |
|----|-------|-------|-------|-------|-------|-------|
| Co | 0.14  | 0.15  | 0.25  | 0.21  | 0.27  | 0.58  |
| Se | 0.18  | 0.26  | 0.37  | 0.39  | 0.44  | 0.53  |
| Sb | 0.06  | 0.08  | 0.27  | 0.13  | 0.19  | 1.22  |
| Rb | 0.73  | 0.85  | 2.50  | 1.12  | 3.78  | 7.97  |
| Mo | 0.26  | 0.41  | 0.74  | 0.54  | 1.17  | 1.36  |
| U  | 0.105 | 0.118 | 0.283 | 0.231 | 0.483 | 0.561 |
| Cd | 0.002 | 0.003 | 0.024 | 0.008 | 0.049 | 0.088 |
